# Supplementary material for: Five year change in alcohol intake and risk of breast cancer and coronary heart disease among postmenopausal women: prospective cohort study
Source: PubMed Central journal article supplement — BMJ. 2016 May 11;353:i2314. doi: 10.1136/bmj.i2314 (PMC5068920; doi:10.1136/bmj.i2314), 2016-05-11

**Web figure** Hazard ratios of all cause mortality by 5-year change in alcohol intake for women drinking <7 (3a), 7-13 (3b), and 14+ (3c) drinks per week, respectively, in the 1993-1998 examination. The curves represent HRs (dotted lines denote 95% confidence intervals) of all-cause mortality by change in alcohol intake from the 1993-1998 to the 1999-2003 examinations, modelled by cubic splines. Women who changed their alcohol intake outside the 0.5-99.5% percentiles of the distribution of change in alcohol intake were excluded from analyses presented in the figure, making 13 335 women and 1309 cases (3a), 4381 women and 366 cases (3b), and 3593 women and 375 cases (3c) eligible for analysis, respectively. Estimates are adjusted for age, education, body mass index, Mediterranean Diet Score, smoking, physical activity, hypertension, elevated cholesterol, diabetes, self-reported health, and alcohol intake in the 1993-1998 examination.

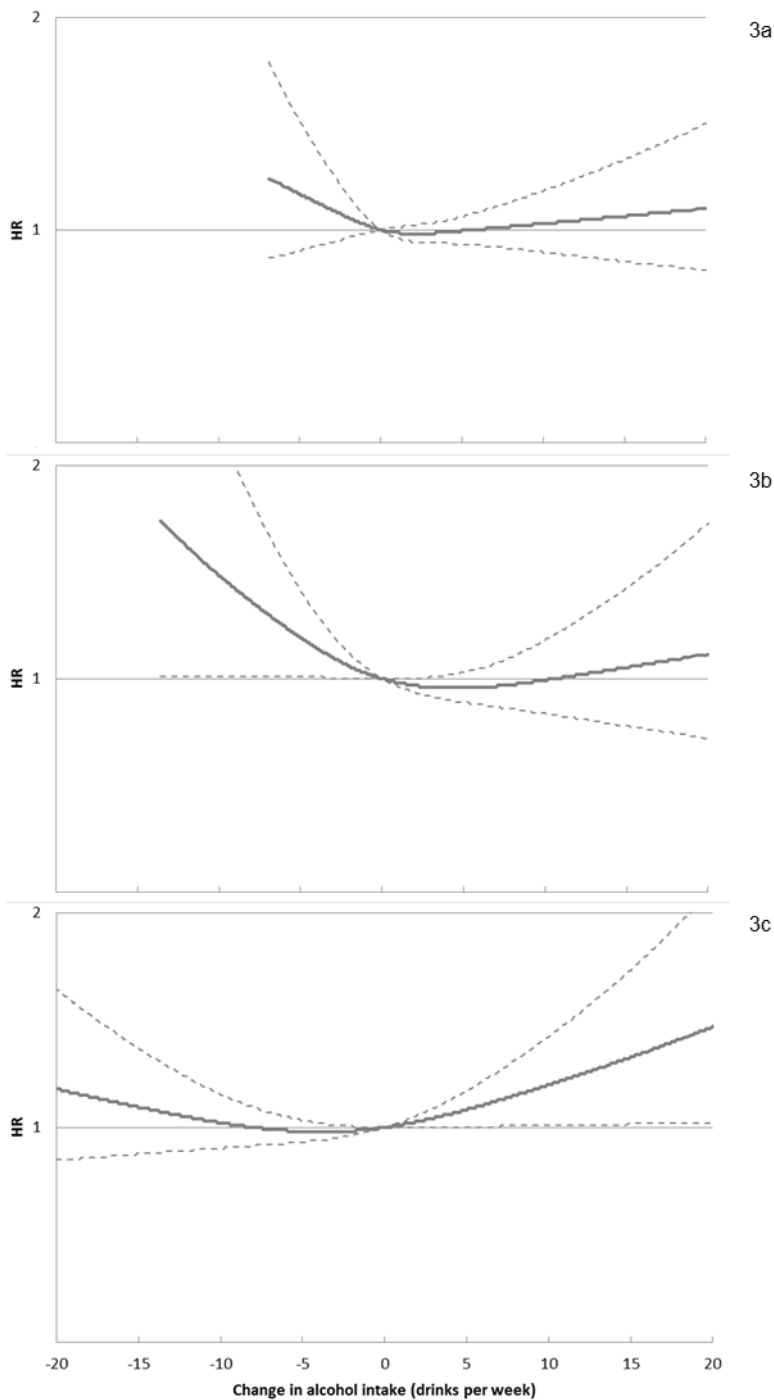

Supplement: damm027354.wf_default.pdf [file damm027354.wf_default.pdf]
