# Supplementary material for: Five year change in alcohol intake and risk of breast cancer and coronary heart disease among postmenopausal women: prospective cohort study
Source: PubMed Central journal article supplement — BMJ. 2016 May 11;353:i2314. doi: 10.1136/bmj.i2314 (PMC5068920; doi:10.1136/bmj.i2314), 2016-05-11
Supplement: damm027354.wt_default.pdf [file damm027354.wt_default.pdf]

**Web table** Hazard ratios (95% confidence intervals) of all-cause mortality by alcohol intake in the 1993-1998 and 1999-2003 examinations

| Alcohol intake (drinks per week)*    |                       |                     |                     |                     |
|--------------------------------------|-----------------------|---------------------|---------------------|---------------------|
| 1993-1998 examination                | 1999-2003 examination |                     |                     |                     |
|                                      | <7                    | 7 - 13              | 14-20               | 21+                 |
| Number of cases/person years         |                       |                     |                     |                     |
| <7                                   | 1132/123 551          | 120/17 082          | 43/4762             | 16/1958             |
| 7 – 13                               | 136/ 15 641           | 143/ 21156          | 52/8055             | 35/3941             |
| 14-20                                | 33/2898               | 43/4888             | 75/10 177           | 40/4156             |
| 21+                                  | 22/1507               | 30/2812             | 46/5073             | 114/ 9063           |
| Stratified analysis <sup>a</sup>     |                       |                     |                     |                     |
| <7                                   | 1.00                  | 0.94 (0.78 to 1.14) | 0.98 (0.72 to 1.32) | 0.86 (0.53 to 1.42) |
| 7 – 13                               | 1.14 (0.90 to 1.44)   | 1.00                | 0.88 (0.64 to 1.21) | 1.12 (0.77 to 1.62) |
| 14-20                                | 1.30 (0.86 to 1.95)   | 1.25 (0.86 to 1.82) | 1.00                | 1.25 (0.85 to 1.83) |
| 21+                                  | 1.11 (0.71 to 1.76)   | 0.89 (0.59 to 1.33) | 0.75 (0.53 to 1.06) | 1.00                |
| Joint category analysis <sup>b</sup> |                       |                     |                     |                     |
| <7                                   | 1.00                  | 0.94 (0.78 to 1.14) | 0.98 (0.72 to 1.32) | 0.86 (0.53 to 1.42) |
| 7 – 13                               | 1.02 (0.85 to 1.22)   | 0.89 (0.75 to 1.07) | 0.79 (0.59 to 1.04) | 1.00 (0.71 to 1.40) |
| 14-20                                | 1.15 (0.81 to 1.62)   | 1.10 (0.81 to 1.50) | 0.88 (0.70 to 1.12) | 1.10 (0.80 to 1.51) |
| 21+                                  | 1.44 (0.94 to 2.19)   | 1.14 (0.80 to 1.65) | 0.97 (0.72 to 1.30) | 1.29 (1.06 to 1.57) |

\*1 drink corresponds to 12 grams of pure alcohol.

<sup>a</sup>Stratified by alcohol intake in the 1993-1998 examination, with stable alcohol intake as reference.

<sup>b</sup>Joint category analysis with stable alcohol intake of <7 drinks per week in the 1993-1998 and 1999-2003 examinations as reference.

Estimates are adjusted for age, education, body mass index, Mediterranean Diet Score, smoking, physical activity, hypertension, elevated cholesterol, diabetes, and self-reported health.
